# Supplementary material for: Sprouty Proteins Inhibit Receptor-mediated Activation of Phosphatidylinositol-specific Phospholipase C
Source: PubMed Central journal article supplement — Mol Biol Cell. 2010 Oct 1;21(19):3487–96. doi: 10.1091/mbc.E10-02-0123 (PMC2947483; doi:10.1091/mbc.e10-02-0123), 2010-10-01

## Supplemental Figure Legends

**Supplemental Figure 1. Expression and purification of GST fusion protein of PLC $\gamma$ 1 SH2 C and its control (GST).** 20 $\mu$ l of whole cell lysate from cells transformed with a GST expression vector or GST-PLC $\gamma$ 1-SH2-C vector before (UI) or after (IND) induction with IPTG were subjected to SDS-PAGE. The gel was stained with coomassie brilliant blue to visualize the protein expression (lane 3-6). 20 $\mu$ g of purified GST or GST-PLC $\gamma$ 1-SH2-C were subjected to SDS-PAGE and stained with coomassie brilliant blue (Lanes 1-2).

**Supplemental Figure 2. PLC $\beta$ 1 and PLC $\delta$ 1 are not expressed in fibroblasts.** Sprouty 1,2,4 null or control fibroblasts were serum starved and treated with PDGF:BB (20ng/ml) for the indicated time. 50 $\mu$ g of Cell lysate was immunoblotted for PLC $\gamma$ 1, PLC $\beta$ 1, and PLC $\delta$ 1.

**Supplemental Figure 3. A) Sprouty1 expression upon Doxycycline induction in NIH 3T3 cells.** NIH 3T3 cells engineered to express Spry1 under doxycycline control treated overnight with doxycycline in starvation media, treated with PDGF:BB (20ng/ml) for the indicated time and 50 $\mu$ g of cell lysate was immunoblotted with antibodies directed against anti-Spry1 and anti-beta actin. **B) Genomic PCR analysis for Spry gene integrity.** Fibroblasts created from Spry1,2,4<sup>flox/flox</sup> mouse embryos were immortalized by passage under a 3T3 protocol and infected with recombinant adenoviruses AdCMV5-eGFP or AdCMVCre-eGFP. Genomic PCR analysis confirms the deletion of Spry1, 2 and 4 from the fibroblasts. **C) Genomic PCR analysis for Spry2 genes expression in Spry2<sup>+/+</sup> and Spry2<sup>-/-</sup> Mast cells.** Mast cells derived from Spry2<sup>+/+</sup> and Spry2<sup>-/-</sup> bone marrow cultured for four weeks in Iscove modified Dulbecco media + glutamine containing 10ng/mL IL3 and 20ng/ml murine stem cell factor (SCF). Genomic PCR analysis performed to test their presence and absence of Spry2 in mast cells derived from Spry2<sup>+/+</sup> and Spry2<sup>-/-</sup> mice. **D) Sprouty 1,2,4 null or control fibroblasts were serum starved and treated with PDGF BB (20ng/ml) for the indicated times.** 50 $\mu$ g of Cell lysate were immunoblotted for Spry2 antibody.

**Supplemental Figure 4. A) siRNA depletion of PLC $\gamma$ 1 and PLC $\gamma$ 2 in Spry1 overexpressing cells.** NIH 3T3 cells engineered to express Spry1 under doxycycline control were depleted for endogenous PLC $\gamma$ 1 and PLC $\gamma$ 2 using siGENOME SMARTpool duplex RNA oligonucleotides for 24h, followed by transient transfection with NFAT luciferase reporter (5 $\mu$ g) and Renilla (50ng) plasmids using Fugene (Amersham) in duplicate. Serum starved (0.2% FBS containing serum media along with doxycycline) cells were either left unstimulated or stimulated with PDGF BB (20ng/ml) for 4h. 50 $\mu$ g of whole cell lysate was immunoblotted for PLC $\gamma$ 1, PLC $\gamma$ 2, Spry1 and GAPDH. **B) siRNA depletion of PLC $\gamma$ 1 and PLC $\gamma$ 2 in Spry2 overexpressing cells.** NIH 3T3 cells were treated with siGENOME SMARTpool directed against PLC $\gamma$ 1 and PLC $\gamma$ 2 for 24 hours followed by transient transfection with a NFAT luciferase reporter (5 $\mu$ g), Renilla (50ng) and Spry2 (1 $\mu$ g) expression plasmids using Fugene (Amersham) in duplicates. Serum starved (0.2% FBS containing serum media) cells were either left unstimulated or stimulated with PDGF BB (20ng/ml) for 4h. 50 $\mu$ g of whole cell lysate was immunoblotted for PLC $\gamma$ 1, PLC $\gamma$ 2, Spry2 and GAPDH. **C) The effect of PLC $\gamma$  depletion of calcium-dependent transcription. Top-NIH 3T3**

cells engineered to express Spry1 under doxycycline control were depleted for PLC $\gamma$ 1 and PLC $\gamma$ 2 using siGENOME SMARTpool RNA oligonucleotides for 24h followed by transient transfection in duplicate with a NFAT luciferase reporter (5 $\mu$ g) and Renilla (50ng) plasmids using Fugene (Amersham) in triplicates. Serum starved (0.2% FBS containing serum media along with doxycycline) cells were either left unstimulated or stimulated with PDGF BB (20ng/ml) for 4h. The cells were then assayed using the Dual Luciferase Assay kit (Promega), normalizing firefly luciferase activity to Renilla luciferase activity. **C) Bottom-** NIH 3T3 cells were depleted for PLC $\gamma$ 1 and PLC $\gamma$ 2 as above followed by transient transfection in duplicate with a NFAT luciferase reporter (5 $\mu$ g), Renilla (50ng) and Spry2 (1 $\mu$ g) expression plasmids using Fugene (Amersham). Serum starved (0.2% FBS containing serum media) cells were either left unstimulated or stimulated with PDGF BB (20ng/ml) for 4h. The cells were then assayed using the Dual Luciferase Assay kit (Promega), normalizing luciferase activity to Renilla luciferase activity.

## Supplemental Methods

### Genomic PCR analysis

The following Primers used to identify the genotype of Spry 1,2, 4 wt and Spry 1,2, and 4 null MEFs as well as Spry2<sup>+/+</sup> and Spry2<sup>-/-</sup> Mast cells.

#### Spy1

71: 5'-CTCAATAGGAGTGGACTGTGAAACTGC-3'

72: 5'-GGGAAAACCGTGTTCTAAGGAGTAGC-3'

73: 5'-GTTCTTTGTGGCAGACACTCTTCATTC-3'

#### Spy2

12: 5'-GGATGGCTCTGATCTGATCC-3'

138: 5'-GCATGGGCTATTCACAAAC-3'

148: 5'-TTGAGAACATGCCTCGACC-3'

#### Spy4

F1: 5'-CAGGACTTGGGAGTGCTTCCTTAG-3'

B3: 5'-CCTCCTAGTACCTTTTTGGGGAGAG-3'

B4: 5'-TACAGCAGGAATGGCTACGGTG-3'

PCR cycle parameters were as follows: initial step 95 C for 5 min and then 33 cycles of 94 C for 30 s, annealing temperature 57 C for 30 s, and the final step of 72 C for 45 s using the above mentioned primers. Following table used to identify the specific gene amplification.

| <b>Gentotype</b> | <b>Spry1</b>  | <b>Spry2</b>  | <b>Spry4</b>  |
|------------------|---------------|---------------|---------------|
| <b>Wt</b>        | <b>314 bp</b> | <b>350 bp</b> | <b>300 bp</b> |
| <b>Mut</b>       | <b>150 bp</b> | <b>250 bp</b> | <b>450 bp</b> |
| <b>Flox</b>      | <b>342 bp</b> | <b>515 bp</b> | <b>450 bp</b> |

Supplemental Table 1A-C. Inositol phosphate (IP) levels of three different experiments from NIH 3T3 cells overexpressing Spry1 (A), Spry1-4 wt and Spry 1-4 null cells (B) and Spry2 wt and Spry2 null Mast cells (C).

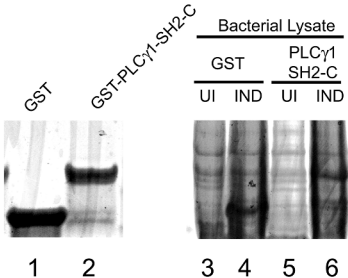

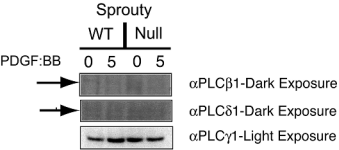

**A**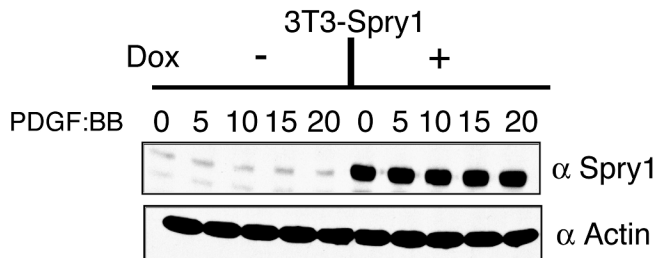**B**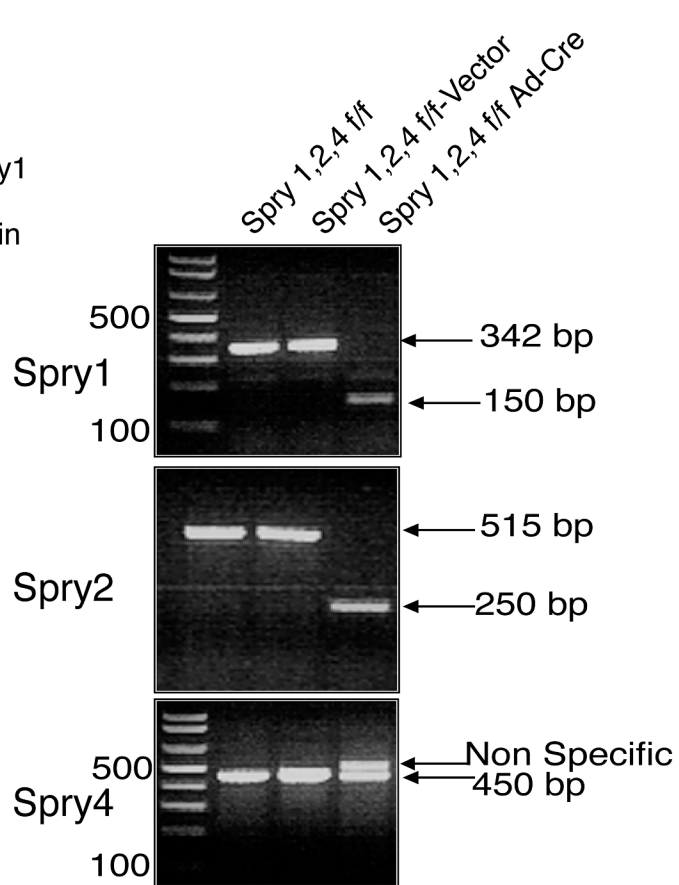**C**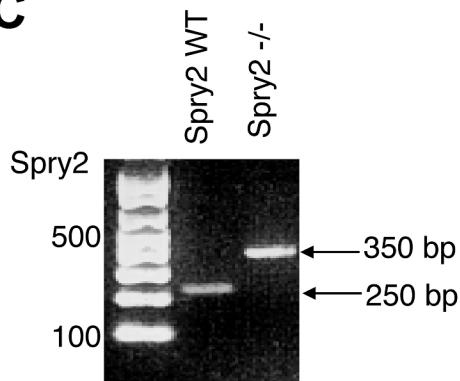**D**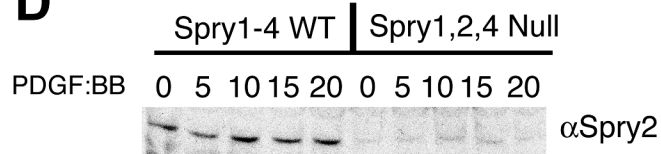

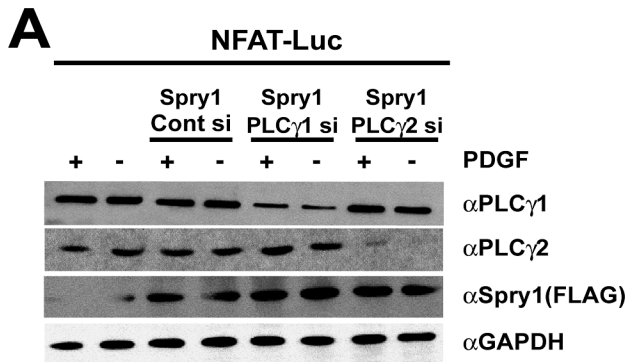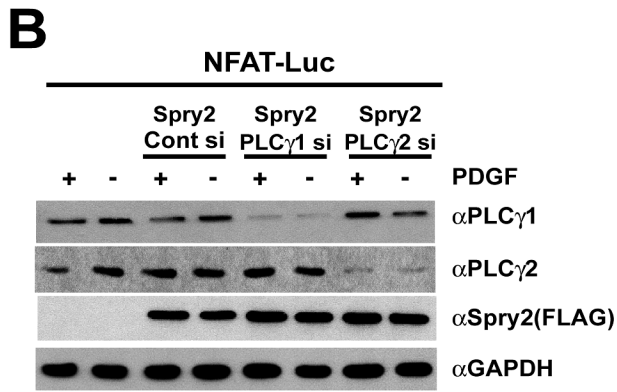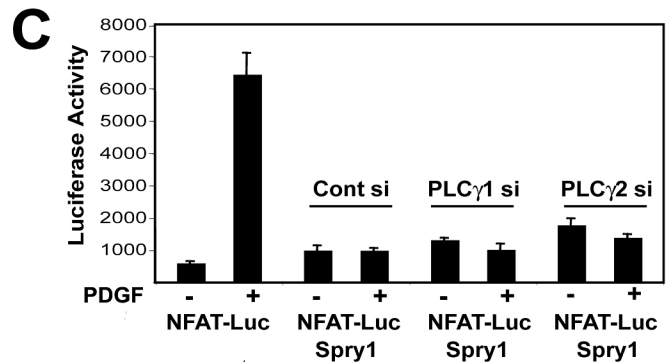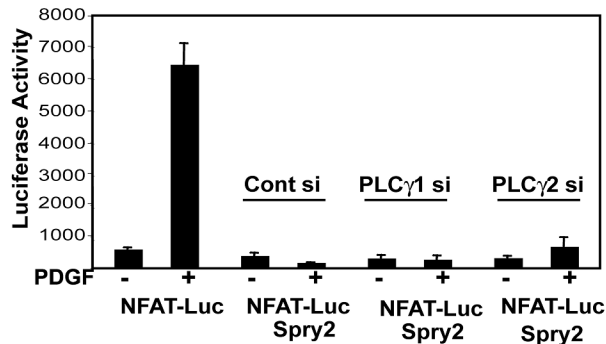

Supplement: E10-02-0123_1.pdf [file E10-02-0123_1.pdf]
