# Supplementary material for: Sprouty Proteins Inhibit Receptor-mediated Activation of Phosphatidylinositol-specific Phospholipase C
Source: PubMed Central journal article supplement — Mol Biol Cell. 2010 Oct 1;21(19):3487–96. doi: 10.1091/mbc.E10-02-0123 (PMC2947483; doi:10.1091/mbc.e10-02-0123), 2010-10-01
Supplement: E10-02-0123_2.pdf [file E10-02-0123_2.pdf]

**Supplementary Table 1A. Inositol phosphate levels in Spry1 overexpression in NIH-3T3 cells upon PDGF activation**

| EXPT1 |         |        |      | EXPT2 |         |        |      | EXPT3 |         |        |      |
|-------|---------|--------|------|-------|---------|--------|------|-------|---------|--------|------|
| IP1   | PDGF BB | NO DOX | DOX  | IP1   | PDGF BB | NO DOX | DOX  | IP1   | PDGF BB | NO DOX | DOX  |
|       | 0       | 10.0   | 11.3 |       | 0       | 12.5   | 9.8  |       | 0       | 8.7    | 6.2  |
|       | 5       | 13.4   | 11.1 |       | 5       | 16.5   | 11.6 |       | 5       | 11.6   | 7.4  |
|       | 10      | 21.1   | 12.6 |       | 10      | 20.1   | 11.6 |       | 10      | 17.6   | 9.4  |
|       | 15      | 25.3   | 10.3 |       | 15      | 25.0   | 13.5 |       | 15      | 19.2   | 11.0 |
|       | 20      | 33.1   | 11.9 |       | 20      | 34.0   | 11.3 |       | 20      | 22.5   | 11.5 |
| IP2   | PDGF BB | NO DOX | DOX  | IP2   | PDGF BB | NO DOX | DOX  | IP2   | PDGF BB | NO DOX | DOX  |
|       | 0       | 4.6    | 3.7  |       | 0       | 1.7    | 2.1  |       | 0       | 2.8    | 1.9  |
|       | 5       | 3.8    | 2.5  |       | 5       | 2.6    | 1.1  |       | 5       | 5.0    | 2.2  |
|       | 10      | 8.2    | 3.1  |       | 10      | 5.1    | 1.9  |       | 10      | 7.6    | 2.7  |
|       | 15      | 8.4    | 3.4  |       | 15      | 6.8    | 2.4  |       | 15      | 11.6   | 3.1  |
|       | 20      | 12.9   | 2.8  |       | 20      | 11.0   | 2.7  |       | 20      | 14.4   | 3.4  |
| IP3   | PDGF BB | NO DOX | DOX  | IP3   | PDGF BB | NO DOX | DOX  | IP3   | PDGF BB | NO DOX | DOX  |
|       | 0       | 1.0    | 0.5  |       | 0       | 0.6    | 0.5  |       | 0       | 1.0    | 0.7  |
|       | 5       | 1.2    | 0.6  |       | 5       | 0.7    | 0.7  |       | 5       | 1.2    | 0.9  |
|       | 10      | 1.6    | 0.6  |       | 10      | 1.3    | 0.8  |       | 10      | 1.9    | 1.0  |
|       | 15      | 2.0    | 0.8  |       | 15      | 1.4    | 1.0  |       | 15      | 2.7    | 1.0  |
|       | 20      | 2.1    | 0.6  |       | 20      | 1.8    | 0.8  |       | 20      | 3.1    | 1.2  |

**Supplementary Table 1B. Inositol phosphate levels in Spry1,2,4 wt and Spry 1,2,4 null cells upon PDGF activation**

| EXPT1 |         |                     |                  | EXPT2 |         |                     |                  | EXPT3 |         |                     |                  |
|-------|---------|---------------------|------------------|-------|---------|---------------------|------------------|-------|---------|---------------------|------------------|
| IP1   | PDGF BB | Spry 1-4 f/f Vector | Spry 1-4 f/f Cre | IP1   | PDGF BB | Spry 1-4 f/f Vector | Spry 1-4 f/f Cre | IP1   | PDGF BB | Spry 1-4 f/f Vector | Spry 1-4 f/f Cre |
|       | 0       | 3.2                 | 6.3              |       | 0       | 5.6                 | 8.4              |       | 0       | 3.5                 | 11.6             |
|       | 5       | 2.4                 | 8.2              |       | 5       | 3.2                 | 7.6              |       | 5       | 2.8                 | 11.1             |
|       | 10      | 4.2                 | 8.4              |       | 10      | 6.0                 | 9.7              |       | 10      | 6.8                 | 12.6             |
|       | 15      | 6.0                 | 7.9              |       | 15      | 7.3                 | 11.3             |       | 15      | 9.9                 | 14.5             |
|       | 20      | 5.2                 | 10.4             |       | 20      | 9.5                 | 13.5             |       | 20      | 11.1                | 16.8             |
| IP2   | PDGF BB | Spry 1-4 f/f Vector | Spry 1-4 f/f Cre | IP2   | PDGF BB | Spry 1-4 f/f Vector | Spry 1-4 f/f Cre | IP2   | PDGF BB | Spry 1-4 f/f Vector | Spry 1-4 f/f Cre |
|       | 0       | 4.5                 | 10.7             |       | 0       | 3.8                 | 9.8              |       | 0       | 4.7                 | 13.7             |
|       | 5       | 3.9                 | 14.3             |       | 5       | 4.0                 | 8.5              |       | 5       | 3.0                 | 12.8             |
|       | 10      | 6.5                 | 14.1             |       | 10      | 6.6                 | 11.6             |       | 10      | 4.9                 | 14.0             |
|       | 15      | 6.6                 | 14.3             |       | 15      | 6.9                 | 13.5             |       | 15      | 6.6                 | 14.6             |
|       | 20      | 8.1                 | 13.1             |       | 20      | 9.0                 | 15.8             |       | 20      | 7.9                 | 16.5             |
| IP3   | PDGF BB | Spry 1-4 f/f Vector | Spry 1-4 f/f Cre | IP3   | PDGF BB | Spry 1-4 f/f Vector | Spry 1-4 f/f Cre | IP3   | PDGF BB | Spry 1-4 f/f Vector | Spry 1-4 f/f Cre |
|       | 0       | 0.8                 | 2.0              |       | 0       | 1.2                 | 2.6              |       | 0       | 1.1                 | 4.6              |
|       | 5       | 0.5                 | 2.9              |       | 5       | 1.0                 | 4.6              |       | 5       | 1.9                 | 4.1              |
|       | 10      | 1.5                 | 2.9              |       | 10      | 1.4                 | 4.5              |       | 10      | 1.5                 | 6.9              |
|       | 15      | 1.3                 | 2.6              |       | 15      | 1.5                 | 5.0              |       | 15      | 2.6                 | 5.8              |
|       | 20      | 1.5                 | 3.1              |       | 20      | 2.3                 | 5.4              |       | 20      | 2.9                 | 7.6              |

**Supplementary Table 1C. Inositol phosphate levels in *Spry2* wt and *Spry2* null in mast cells upon Fc receptor activation**

| EXPT1 |           |     |      | EXPT2 |           |     |      | EXPT3 |           |     |      |
|-------|-----------|-----|------|-------|-----------|-----|------|-------|-----------|-----|------|
| IP1   | IgE (min) | WT  | Null | IP1   | IgE (min) | WT  | Null | IP1   | IgE (min) | WT  | Null |
|       | 0         | 1.9 | 4.5  |       | 0.0       | 2.5 | 4.0  |       | 0.0       | 1.2 | 2.8  |
|       | 0.5       | 1.0 | 6.1  |       | 0.5       | 4.4 | 5.4  |       | 0.5       | 2.6 | 4.6  |
|       | 1.5       | 2.5 | 4.8  |       | 1.5       | 5.6 | 6.4  |       | 1.5       | 2.3 | 8.3  |
|       | 3         | 2.2 | 7.6  |       | 3.0       | 5.6 | 3.8  |       | 3.0       | 3.8 | 7.2  |
|       | 6         | 3.3 | 8.7  |       | 6.0       | 3.5 | 5.3  |       | 6.0       | 3.5 | 9.3  |
| IP2   | IgE (min) | WT  | Null | IP2   | IgE (min) | WT  | Null | IP2   | IgE (min) | WT  | Null |
|       | 0         | 4.0 | 6.1  |       | 0.0       | 2.4 | 4.2  |       | 0.0       | 1.5 | 2.7  |
|       | 0.5       | 2.3 | 6.1  |       | 0.5       | 5.0 | 3.3  |       | 0.5       | 1.9 | 4.5  |
|       | 1.5       | 2.8 | 4.2  |       | 1.5       | 4.5 | 3.4  |       | 1.5       | 2.3 | 5.4  |
|       | 3         | 2.7 | 6.3  |       | 3.0       | 3.4 | 4.3  |       | 3.0       | 2.7 | 5.9  |
|       | 6         | 4.1 | 4.0  |       | 6.0       | 3.2 | 4.2  |       | 6.0       | 3.0 | 6.3  |
| IP3   | IgE (min) | WT  | Null | IP3   | IgE (min) | WT  | Null | IP3   | IgE (min) | WT  | Null |
|       | 0         | 2.3 | 3.0  |       | 0.0       | 2.6 | 5.8  |       | 0.0       | 2.4 | 2.9  |
|       | 0.5       | 1.3 | 2.7  |       | 0.5       | 4.6 | 5.9  |       | 0.5       | 2.3 | 4.0  |
|       | 1.5       | 1.7 | 2.8  |       | 1.5       | 4.2 | 4.9  |       | 1.5       | 3.3 | 4.1  |
|       | 3         | 2.0 | 3.2  |       | 3.0       | 5.5 | 7.1  |       | 3.0       | 3.4 | 4.6  |
|       | 6         | 1.7 | 3.7  |       | 6.0       | 4.1 | 3.4  |       | 6.0       | 3.9 | 5.8  |
